# Supplementary material
Source: PubMed Central journal article supplement (PMC8222004)
Supplement: mmc1.pdf [file mmc1.pdf]

# THE LANCET

## Infectious Diseases

### Supplementary appendix

This appendix formed part of the original submission and has been peer reviewed. We post it as supplied by the authors.

Supplement to: Menni C, Klaser K, May A, et al. Vaccine side-effects and SARS-CoV-2 infection after vaccination in users of the COVID Symptom Study app in the UK: a prospective observational study. *Lancet Infect Dis* 2021; published online April 27. [https://doi.org/10.1016/S1473-3099\(21\)00224-3](https://doi.org/10.1016/S1473-3099(21)00224-3).

## **Vaccine after effects and post-vaccine infection in a community setting - results from the COVID Symptom Study app**

Cristina Menni, PhD, Kerstin Klaser, MSc, Anna May, MA, Lorenzo Polidori, MSc, Joan Capdevila, PhD, Panayiotis Louca, MSc, Carole H. Sudre, PhD, Long H. Nguyen, MD, David A. Drew, PhD, Jordi Merino, PhD, Christina Hu, BA, Somesh Selvachandran, MEng, Michela Antonelli, PhD, Benjamin Murray, MSc, Liane S. Canas, PhD, Erika Molteni, PhD, Mark S. Graham, PhD, Marc Modat, PhD, Amit D. Joshi, PhD, Massimo Mangino, PhD, Prof Alexander Hammers, PhD, Anna L Goodman, DPhil, Prof Andrew T. Chan, MD, Jonathan Wolf, MA, Claire J. Steves, PhD, Prof Ana M. Valdes, PhD, Prof Sebastien Ourselin, PhD, Prof Tim D. Spector, MD

### **APPENDIX**

#### **Table of Contents**

|                                                                                                                                                                                  |    |
|----------------------------------------------------------------------------------------------------------------------------------------------------------------------------------|----|
| <b>Supplementary Figure 1.</b> Consort diagram                                                                                                                                   | 2  |
| <b>Supplementary Figure 2.</b> Age distribution of the study population.                                                                                                         | 3  |
| <b>Supplementary Table 1.</b> Questions from the ZOE COVID Symptom Study app                                                                                                     | 6  |
| <b>Supplementary Table 2.</b> Demographic characteristics of the vaccinated then subsequently tested study population, compared to the unvaccinated control group.               | 8  |
| <b>Supplementary Table 3.</b> Prevalence of side effects by demographic strata and by dose and type of vaccine (unadjusted % are presented).                                     | 9  |
| <b>Supplementary Table 4.</b> Demographic and other characteristics of participants who reported side effects and of those not reporting them.                                   | 11 |
| <b>Supplementary Table 5.</b> Characteristics of app users reporting side effects by completeness of reporting.                                                                  | 12 |
| <b>Supplementary Table 6.</b> Proportion of individuals reporting systemic side-effects after BNT162b2 first dose, BNT162b2 second dose or ChAdOx1 nCoV-19 first dose by strata. | 13 |
| <b>Supplementary Table 7.</b> Proportion of individuals reporting local side-effects after BNT162b2 first dose, BNT162b2 second dose or ChAdOx1 nCoV-19 first dose by strata.    | 14 |
| <b>Supplementary Text</b>                                                                                                                                                        | 15 |

**Supplementary Figure 1. Consort diagram**

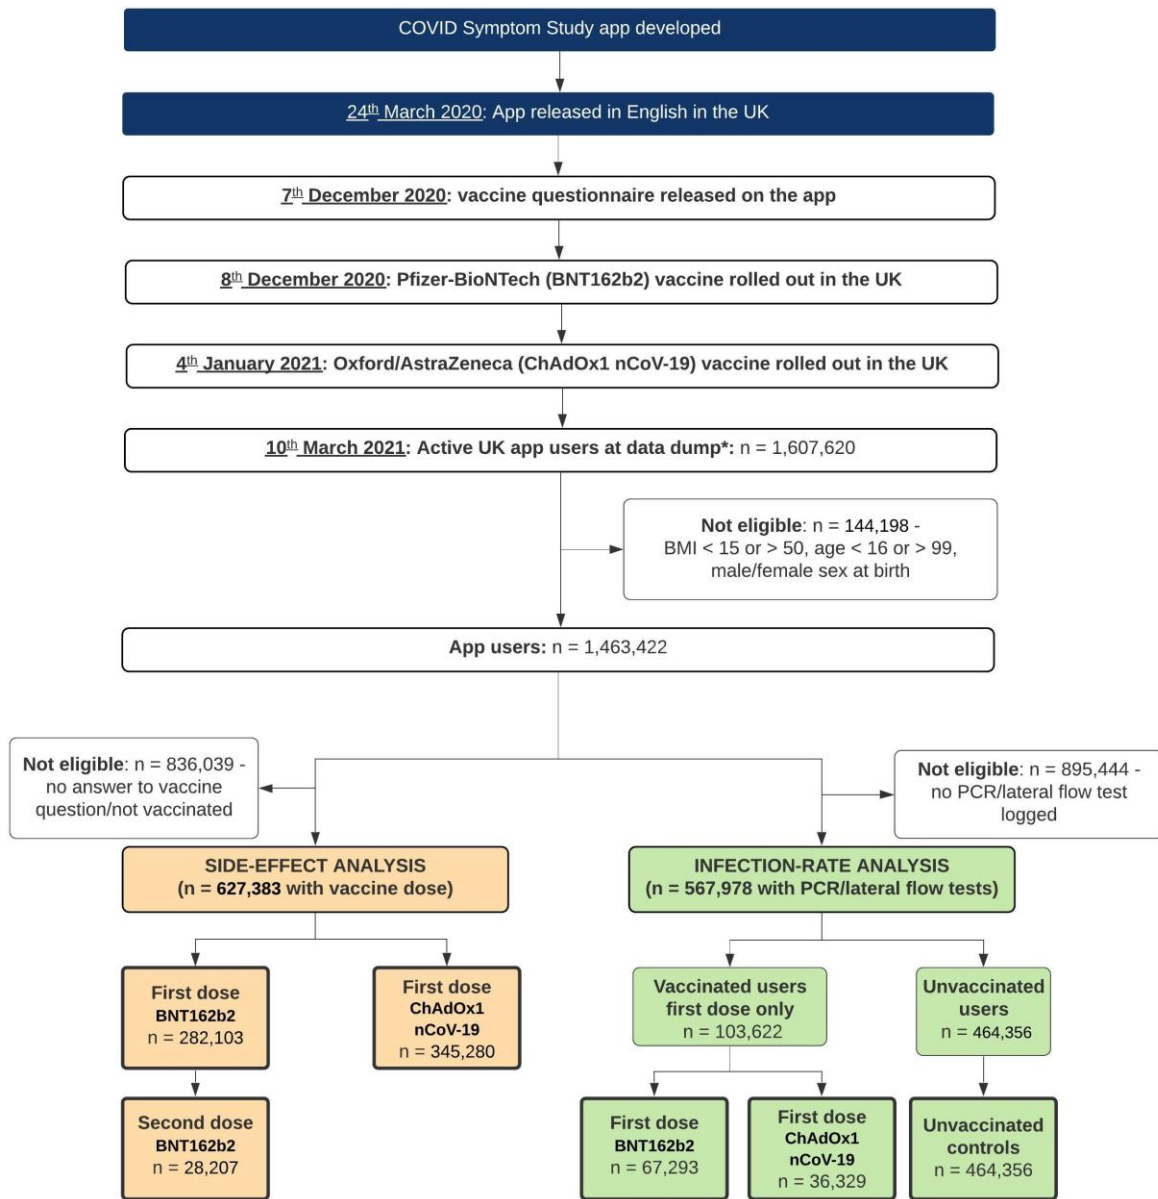

**Supplementary Figure 2.** Age distribution of the study population.

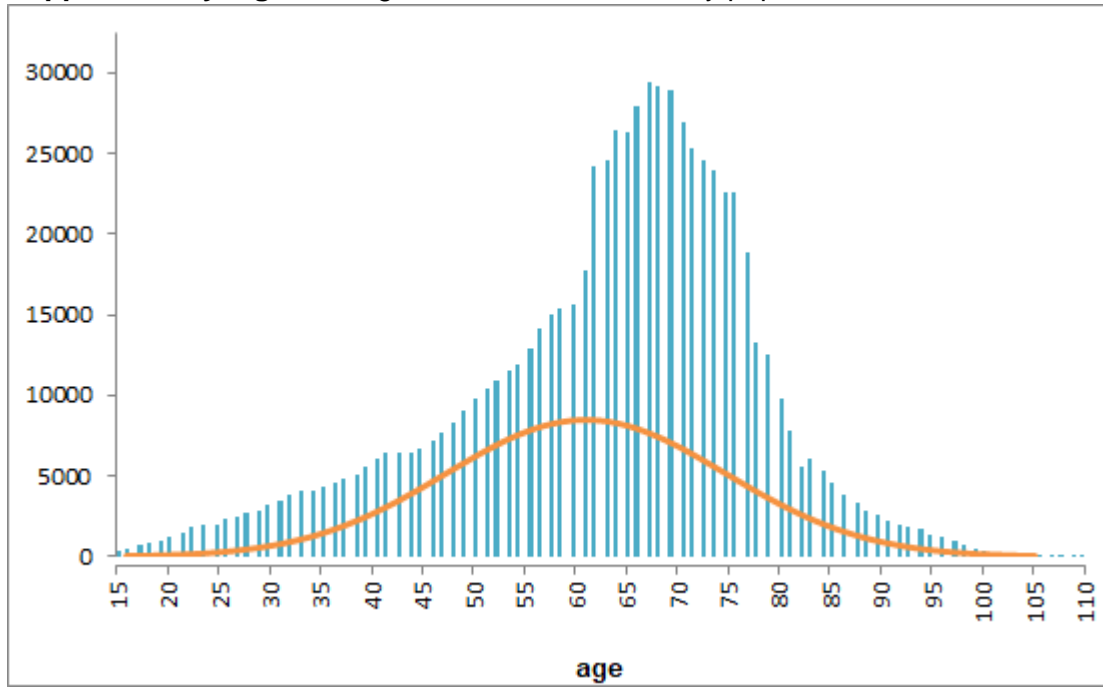

**Supplementary Figure 3.** Kaplan-Meier plot showing the probability of remaining free of SARS-CoV-2 infection over time for individuals who had received the first dose of the BNT162b2 vaccine or the ChAdOx1 vaccine. Unvaccinated individuals are selected from among all unvaccinated users to have had a PCR/lateral flow test on the same day as a vaccinated app user and to have their same age, sex, comorbidity, obesity. Estimates, sample sizes and statistical significance are those from Figure 4.

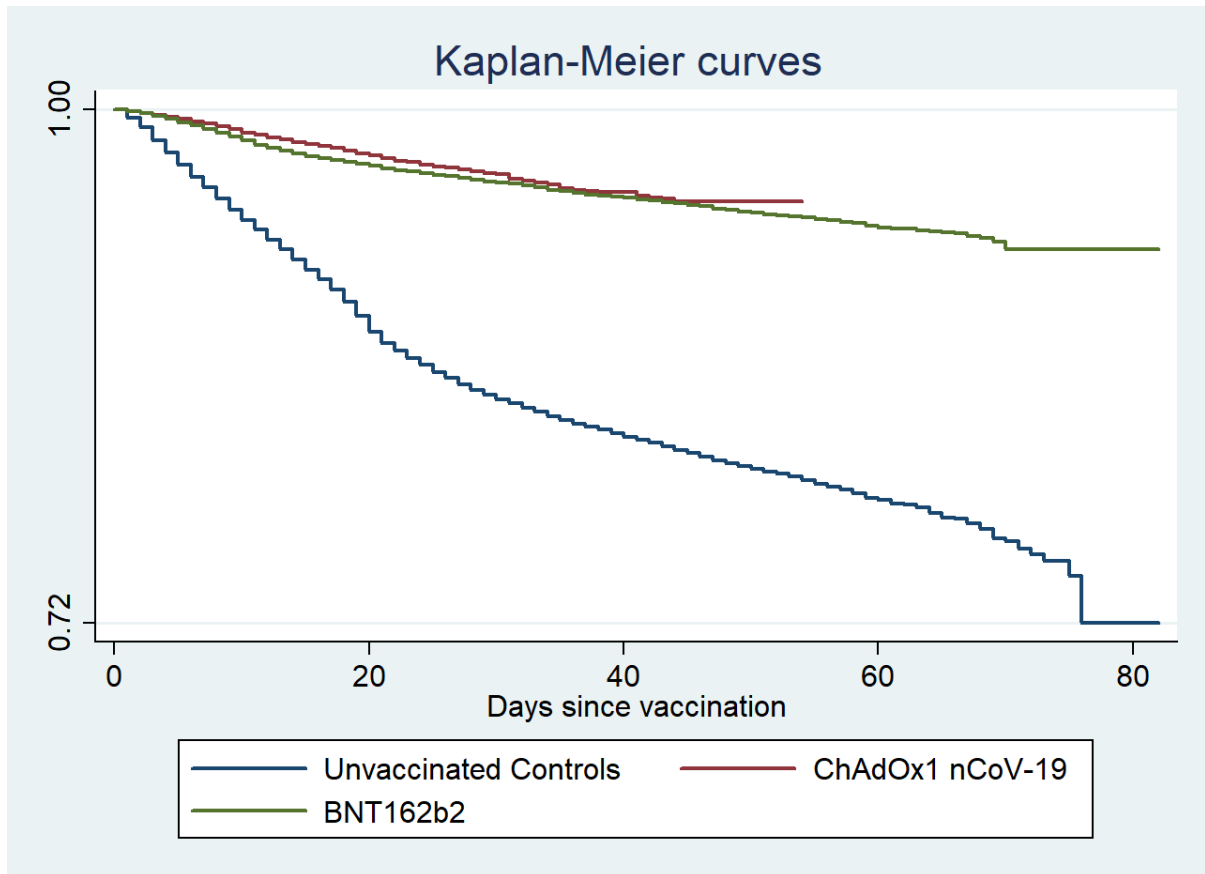

**Supplementary Figure 4.** Stratified infection risk reduction after the first dose in users who have been vaccinated and then subsequently tested. The bar chart represents the  $\geq 12$  days risk reduction of those vaccinated with BNT162b2 or ChAdOx1 nCoV-19 compared to the unvaccinated group, for each of the strata. The black lines represent 95% CIs. The strata are as follows: age:  $\leq 55$  and  $> 55$  year, obesity: BMI  $< 30$  and  $\geq 30$  kg/m<sup>2</sup>, comorbidities: no comorbidities or has at least one comorbidity (diabetes, heart, lung or kidney disease, had chemotherapy, had cancer, takes immunosuppressants), sex: female or male. N: vaccinated= 103,622, control = 464,356.

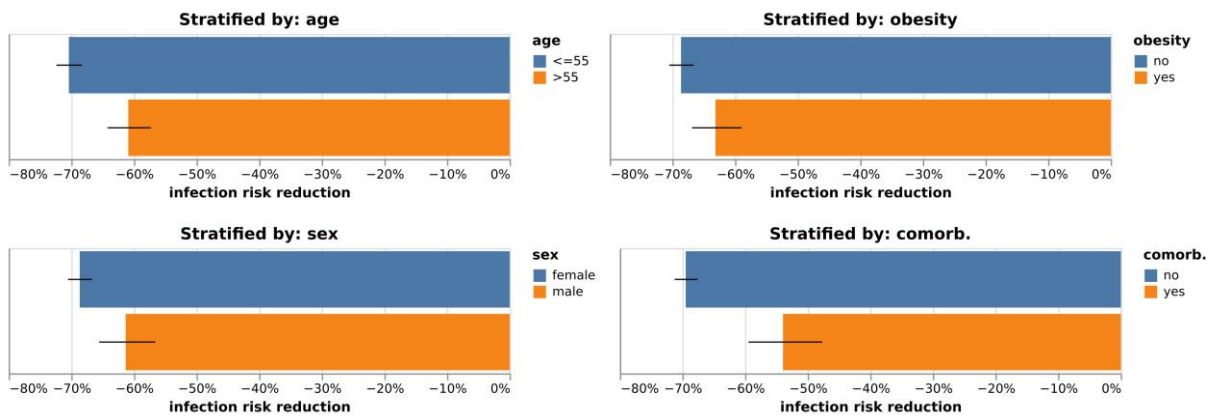

**Supplementary Table 1.** Questions from the ZOE COVID Symptom Study app

| <b>App Screen Name</b>        | <b>App Display Text</b>                                                                                         | <b>Data Value</b>                                                                                                                                                                                                                                                                                                            |
|-------------------------------|-----------------------------------------------------------------------------------------------------------------|------------------------------------------------------------------------------------------------------------------------------------------------------------------------------------------------------------------------------------------------------------------------------------------------------------------------------|
| <b>About your first dose</b>  | <b>What is the name of the vaccine?</b>                                                                         | <i>Astrazeneca<br/>Pfizer<br/>Moderna<br/>Unsure</i>                                                                                                                                                                                                                                                                         |
|                               | <b>When was your injection?</b>                                                                                 | <i>Insert date</i>                                                                                                                                                                                                                                                                                                           |
| <b>About your second dose</b> | <b>What is the name of the vaccine?</b>                                                                         | <i>Astrazeneca<br/>Pfizer<br/>Moderna<br/>Unsure</i>                                                                                                                                                                                                                                                                         |
|                               | <b>When was your injection?</b>                                                                                 | <i>Insert date</i>                                                                                                                                                                                                                                                                                                           |
| <b>Report local effects</b>   | <b>Check all that apply:</b>                                                                                    | <i>Pain<br/>Redness<br/>Swelling<br/>Swollen glands in the armpit<br/>Warmth<br/>Itch<br/>Tenderness<br/>Bruising<br/>Other</i>                                                                                                                                                                                              |
| <b>How you feel</b>           | <b>How do you feel physically right now?</b>                                                                    | <i>I feel physically normal<br/>I'm not feeling quite right</i>                                                                                                                                                                                                                                                              |
| <b>Describe symptoms</b>      | <b>Check all that apply</b><br><br><i>(only those that we consider systemic or allergic effects are listed)</i> | <i>Fever<br/><br/>Chills or shivers<br/><br/>Unusual fatigue (mild, severe)<br/><br/>Rash on your arm or torso<br/><br/>Raised, red, itchy welts on the skin or sudden swelling of the face or lips<br/><br/>Strange, unpleasant sensations in your skin like pins and needles or burning<br/><br/>Unusual strong muscle</i> |

|  |  |                                                                                                                                  |
|--|--|----------------------------------------------------------------------------------------------------------------------------------|
|  |  | <i>pains or aches</i><br><i>Unusual joint pains or aches</i><br><i>Headache</i><br><i>Nausea or vomiting</i><br><i>Diarrhoea</i> |
|--|--|----------------------------------------------------------------------------------------------------------------------------------|



**Supplementary Table 2.** Demographic characteristics of the vaccinated then subsequently tested study population, compared to the unvaccinated control group.

|                      | <b>BNT162b2</b> | <b>ChAdOx1 nCoV-19</b> | <b>Unvaccinated Controls</b> |
|----------------------|-----------------|------------------------|------------------------------|
| N                    | 67293           | 36329                  | 464356                       |
| Positive PCR tests   | 2465            | 641                    | 50340                        |
| Females, n (%)       | 49304 (73.3%) * | 24054 (66.2%) *        | 299412 (64.5%)               |
| Age, years mean(SD)  | 54.5 (14.3) *   | 60.8 (13.5) *          | 49.4 (14.6)                  |
| BMI, Kg/m2 mean(SD)  | 26.8 (5.6) *    | 26.7 (5.3) *           | 26.6 (5.5)                   |
| HCWs, n (%)          | 20421 (30.3%) * | 3817 (10.5%) *         | 32454 (7%)                   |
| Comorbidities, n (%) | 14411 (21.4%) * | 9638 (26.5%) *         | 79753 (17.2%)                |

\* (P<0.05) between BNT162b2 dose 1 and unvaccinated controls and ChAdOx1 nCoV-19 dose 1 and unvaccinated controls (two sample t-test for continuous variables and chi-squared test for categorical variables)

**Supplementary Table 3.** Prevalence of side effects by demographic strata and by dose and type of vaccine (unadjusted % are presented).

| Group                  | All vaccinated                                                           | BNT162b2 first dose                                                              | BNT162b2 second dose                                                          | ChAdOx1 nCoV-19 first dose                                                      |
|------------------------|--------------------------------------------------------------------------|----------------------------------------------------------------------------------|-------------------------------------------------------------------------------|---------------------------------------------------------------------------------|
| <b>Age &lt;= 55</b>    | Headache (23.99%),<br>fatigue (22.19%),<br>Chills or shivers<br>(13.75%) | Headache<br>(13.23%)<br>Fatigue<br>(12.88%)<br>Unusual joint<br>pains (5.22%)    | Headache<br>(20.33%)<br>Fatigue<br>(19.80%)<br>Unusual Joint<br>Pain (10.36%) | Headache<br>(34.70%)<br>Fatigue<br>(31.14%)<br>Chills or<br>shivers<br>(24.26%) |
| <b>Age &gt; 55</b>     | Headache (14.24%),<br>fatigue (14.0%), chills or<br>shivers (8.20%)      | Fatigue<br>(6.59%)<br>Headache<br>(5.57%)<br>Unusual joint<br>pains (2.38%)      | Fatigue<br>(10.84%)<br>Headache<br>(8.52%)<br>Unusual joint<br>pains (4.80%)  | Headache<br>(20.04%)<br>Fatigue<br>(18.79%)<br>Chills or<br>shivers<br>(12.48%) |
| <b>BMI &gt;= 30</b>    | Headache (16.74%),<br>fatigue (16.41%), chills<br>or shivers (8.84%)     | Fatigue<br>(10.13%) ,<br>Headache<br>(9.70%) ,<br>Unusual joint<br>pains (4.46%) | Fatigue<br>(15.51%)<br>Headache<br>(14.87%)<br>Unusual joint<br>pains (9.19%) | Headache<br>(21.73%)<br>Fatigue<br>(20.77%)<br>Chills or<br>shivers<br>(13.02%) |
| <b>BMI &lt; 30</b>     | Headache (16.44%),<br>fatigue (15.76%), chills<br>or shivers (9.67%)     | Fatigue<br>(7.91%)<br>Headache<br>(7.23%)<br>Unusual joint<br>pains (2.84%)      | Fatigue<br>(14.12%)<br>Headache<br>(12.81%)<br>Unusual Joint<br>Pains (6.46%) | Headache<br>(23.09%)<br>Fatigue<br>(21.21%)<br>Chills or<br>shivers<br>(15.15%) |
| <b>Not an HCW</b>      | Headache (15.11%),<br>fatigue (14.91%), chills<br>or shivers (8.90%)     | Fatigue<br>(7.23%),<br>Headache<br>(6.12%) ,<br>Unusual joint<br>pains (2.61%)   | Fatigue<br>(9.01%)<br>Headache<br>(6.31%)<br>Unusual Joint<br>Pains (3.61%)   | Headache<br>(21.07%)<br>Fatigue<br>(19.88%)<br>Chills or<br>shivers<br>(13.49%) |
| <b>HCW</b>             | Headache (19.19%),<br>Fatigue (17.99%),<br>Chills or shivers (9.58%)     | Headache<br>(11.7%),<br>Fatigue<br>(10.94%),<br>Unusual joint<br>pains (5.0%)    | Fatigue<br>(17.61%)<br>Headache<br>(17.21%)<br>Unusual Joint<br>Pains (9.40%) | Headache<br>(31.92%)<br>Fatigue<br>(28.97%)<br>Chills or<br>shivers<br>(21.63%) |
| <b>Has Comorbidity</b> | Fatigue (16.14%)<br>Headache (16.01%)<br>Chills or shivers (8.90%)       | Fatigue<br>(9.08%)<br>Headache<br>(7.95%)                                        | Fatigue<br>(13.36%)<br>Headache<br>(11.59%)                                   | Headache<br>(22.31%)<br>Fatigue<br>(21.46%)<br>Chills or                        |

|                                  |                           | Unusual Joint Pains (3.48%) | Unusual Joint Pains (6.46%) | shivers (13.96%)           |
|----------------------------------|---------------------------|-----------------------------|-----------------------------|----------------------------|
| <b>Does not Have Comorbidity</b> | Headache (16.69%)         | Fatigue (8.13%)             | Fatigue (14.79%)            | Headache (22.97%)          |
|                                  | Fatigue (15.81%)          | Headache (7.69%)            | Headache (13.83%)           | Fatigue (21.00%)           |
|                                  | Chills or shivers (9.71%) | Unusual Joint Pains (3.09%) | Unusual Joint Pains (7.22%) | Chills or shivers (14.96%) |
|                                  |                           |                             |                             |                            |

**Supplementary Table 4.** Demographic and other characteristics of participants who reported side effects and of those not reporting them.

|                 | Reported local adverse effects? |              | Report systemic adverse effects? |              |
|-----------------|---------------------------------|--------------|----------------------------------|--------------|
|                 | No                              | Yes          | No                               | Yes          |
| N               | 130,633                         | 255,789      | 468,282                          | 159,101      |
| Age, mean (SD)  | 70.49 (10.63)*                  | 62.71(13.93) | 63.79(12.50)*                    | 59.50(13.25) |
| BMI, mean (SD)  | 26.45 (4.86)                    | 26.46(5.20)  | 26.82 (5.31)*                    | 26.73(5.66)  |
| Female %        | 47.70%*                         | 66.16%       | 56.22%*                          | 69.06%       |
| HCW %           | 6.05%*                          | 17.81%       | 9.10%*                           | 11.01%       |
| Comorbidities % | 29.10%*                         | 27.65%       | 26.69%*                          | 26.08%       |

\*significantly ( $P < 0.05$ ) different between those who reported adverse effects and those who didn't (two sample t-test for continuous variables and chi-squared test for categorical

**Supplementary Table 5.** Characteristics of app users reporting side effects by completeness of reporting.

|               | <b>Doses with local adverse effects reports for full week after vaccine?</b> |               | <b>Doses with systemic adverse effects reports for full week after vaccine?</b> |              |
|---------------|------------------------------------------------------------------------------|---------------|---------------------------------------------------------------------------------|--------------|
|               | <b>No</b>                                                                    | <b>Yes</b>    | <b>No</b>                                                                       | <b>Yes</b>   |
| N             | 316,164                                                                      | 83,437        | 455,334                                                                         | 200,256      |
| Age, mean(SD) | 64.97 (13.74)                                                                | 66.61 (12.34) | 61.3 (13.33)                                                                    | 65.8 (11.04) |
| BMI, mean(SD) | 26.46 (5.10)                                                                 | 26.42 (5.05)  | 26.9 (5.50)                                                                     | 26.5 (5.14)  |
| Female %      | 60.02%                                                                       | 59.75 %       | 60.3%                                                                           | 57.71%       |

**Supplementary Table 6.** Proportion of individuals reporting systemic side-effects after BNT162b2 first dose, BNT162b2 second dose or ChAdOx1 nCoV-19 first dose by strata.

|                              | BNT162b2 first dose<br>(n = 282,103) |         |      | BNT162b2 second dose<br>(n = 28,207) |        |      | ChAdOx1 nCoV-19 first dose<br>(n = 345,280) |         |      |
|------------------------------|--------------------------------------|---------|------|--------------------------------------|--------|------|---------------------------------------------|---------|------|
| Report systemic side-effects | n                                    | N       | %    | n                                    | N      | %    | n                                           | N       | %    |
| <b>Age</b>                   |                                      |         |      |                                      |        |      |                                             |         |      |
| ≤ 55                         | 16,733                               | 80,879  | 20.7 | 3,434                                | 11,236 | 30.6 | 30,487                                      | 65,037  | 46.9 |
| > 55                         | 21,422                               | 201,224 | 10.6 | 2,782                                | 16,971 | 16.4 | 85,986                                      | 280,243 | 30.7 |
| <b>Sex</b>                   |                                      |         |      |                                      |        |      |                                             |         |      |
| Female                       | 28,140                               | 173,866 | 16.2 | 4,969                                | 19,640 | 25.3 | 78,222                                      | 199,269 | 39.3 |
| Male                         | 10,015                               | 108,237 | 9.3  | 1,247                                | 8,567  | 14.6 | 38,251                                      | 146,011 | 26.2 |
| <b>BMI</b>                   |                                      |         |      |                                      |        |      |                                             |         |      |
| < 30                         | 28,374                               | 221,114 | 12.8 | 4,849                                | 22,471 | 21.6 | 92,802                                      | 271,938 | 34.1 |
| ≥ 30                         | 9,781                                | 60,989  | 16.0 | 1,367                                | 5,736  | 23.8 | 23,671                                      | 73,342  | 32.3 |
| <b>Comorbidities</b>         |                                      |         |      |                                      |        |      |                                             |         |      |
| Yes                          | 10,991                               | 77,433  | 14.2 | 1,515                                | 7,617  | 19.9 | 29,311                                      | 88,453  | 33.1 |
| No                           | 27,164                               | 204,670 | 13.3 | 4,701                                | 20,590 | 22.8 | 87,162                                      | 256,827 | 33.9 |
| <b>Prior COVID</b>           |                                      |         |      |                                      |        |      |                                             |         |      |
| Yes                          | 5,148                                | 14,369  | 35.8 | 859                                  | 2,251  | 38.2 | 7,551                                       | 14,231  | 53.1 |
| No                           | 33,007                               | 267,734 | 12.3 | 5,357                                | 25,956 | 20.6 | 108,922                                     | 331,049 | 32.9 |
| <b>Time prior COVID</b>      |                                      |         |      |                                      |        |      |                                             |         |      |
| ≤ 6 months                   | 3,726                                | 10,472  | 35.6 | 460                                  | 1,263  | 36.4 | 6,333                                       | 11,972  | 52.9 |
| > 6 months                   | 1,422                                | 3,897   | 36.5 | 399                                  | 988    | 40.4 | 1,218                                       | 2,259   | 53.9 |

n= number of people reporting side effects in a stratum; N=Total number of people in the stratum

**Supplementary Table 7.** Proportion of individuals reporting local side-effects after BNT162b2 first dose, BNT162b2 second dose or ChAdOx1 nCoV-19 first dose by strata.

| Report local side-effects | BNT162b2 first dose<br>(n = 208,767) |         |      | BNT162b2 second dose<br>(n = 13,179) |        |      | ChAdOx1 nCoV-19 first dose<br>(n = 177,655) |         |      |
|---------------------------|--------------------------------------|---------|------|--------------------------------------|--------|------|---------------------------------------------|---------|------|
|                           | n                                    | N       | %    | n                                    | N      | %    | n                                           | N       | %    |
| <b>Age</b>                |                                      |         |      |                                      |        |      |                                             |         |      |
| <55                       | 47,707                               | 54,830  | 87.0 | 3,866                                | 4,485  | 86.2 | 20,348                                      | 24,313  | 83.7 |
| >55                       | 102,316                              | 153,937 | 66.5 | 5,159                                | 8,694  | 59.3 | 83,934                                      | 153,342 | 54.7 |
| <b>Sex</b>                |                                      |         |      |                                      |        |      |                                             |         |      |
| Female                    | 101,958                              | 130,963 | 77.9 | 6,593                                | 8,877  | 74.3 | 66,320                                      | 100,515 | 66.0 |
| Male                      | 48,065                               | 77,804  | 61.8 | 2,432                                | 4,302  | 56.5 | 37,962                                      | 77,140  | 49.2 |
| <b>BMI</b>                |                                      |         |      |                                      |        |      |                                             |         |      |
| < 30                      | 121,107                              | 168,430 | 71.9 | 7,294                                | 10,780 | 67.7 | 83,445                                      | 143,766 | 58.0 |
| > 30                      | 28,916                               | 40,337  | 71.7 | 1,731                                | 2,399  | 72.2 | 20,837                                      | 33,889  | 61.5 |
| <b>Comorbidities</b>      |                                      |         |      |                                      |        |      |                                             |         |      |
| Yes                       | 38,718                               | 55,500  | 69.8 | 2,490                                | 3,988  | 62.4 | 31,520                                      | 53,228  | 59.2 |
| No                        | 111,305                              | 153,267 | 72.6 | 6,535                                | 9,191  | 71.1 | 72,762                                      | 124,427 | 58.5 |
| <b>Prior COVID</b>        |                                      |         |      |                                      |        |      |                                             |         |      |
| Yes                       | 9,086                                | 10,405  | 87.3 | 697                                  | 823    | 84.7 | 4,814                                       | 6,101   | 78.9 |
| No                        | 140,937                              | 198,362 | 71.1 | 8,328                                | 12,356 | 67.4 | 99,468                                      | 171,554 | 58.0 |
| <b>Time prior COVID</b>   |                                      |         |      |                                      |        |      |                                             |         |      |
| < 6 months                | 6,432                                | 7,410   | 86.8 | 364                                  | 432    | 84.3 | 3,945                                       | 4,993   | 79.0 |
| > 6 months                | 2,654                                | 2,995   | 88.6 | 333                                  | 391    | 85.2 | 869                                         | 1,108   | 78.4 |

n= number of people reporting side effects in a stratum; N=Total number of people in the stratum

## Supplementary Text

$$OR = \frac{\frac{P(R|V_{m,n})}{1 - P(R|V_{m,n})}}{\frac{P(R|V_{k,j})}{(1 - P(R|V_{k,j}))}}$$

where  $m, k$  is [ChAdOx1 nCoV-19 OR BNT162b2] and  $n, j$  is [first dose OR second dose],  $R$  is adverse effects,  $V_{m,n}$  and  $V_{k,j}$  indicate the vaccine doses we are comparing.

So  $P(R|V_{k,j})$  is the Pearl's back-door adjusted probability of having adverse effects (local or systemic) after the  $j$ -th dose of the  $k$ -th vaccine type.
